# Supplementary material for: Interaction of a gold(i) dicarbene anticancer drug with human telomeric DNA G-quadruplex: solution and computationally aided X-ray diffraction analysis
Source: Royal Society of Chemistry journal article supplement (doi:10.1039/c8dt03607a), 2018-01-01
Supplement: c8dt03607a1.pdf [file c8dt03607a1.pdf]

## **Interaction of a Gold(I) Dicarbene Anticancer Drug with Human Telomeric DNA G-Quadruplex: Solution and Computationally Aided X-ray Diffraction Analysis**

Federica Guarra,<sup>a†</sup> Tiziano Marzo,<sup>a,b†</sup> Marta Ferraroni,<sup>c</sup> Francesco Papi,<sup>c</sup> Carla Bazzicalupi,<sup>\*c</sup> Paola Gratteri,<sup>\*d</sup> Gennaro Pescitelli,<sup>a</sup> Luigi Messori,<sup>b</sup> Tarita Biver<sup>a</sup> and Chiara Gabbiani<sup>\*a</sup>

<sup>†</sup>Equally contributed

<sup>a</sup>*Department of Chemistry and Industrial Chemistry, University of Pisa, Via G. Moruzzi 13, 56124 Pisa, Italy. E-mail: chiara.gabbiani@unipi.it.*

<sup>b</sup>*Laboratory of Metals in Medicine (MetMed), Department of Chemistry "U. Schiff", University of Florence, Via della Lastruccia 3, 50019 Sesto Fiorentino, Italy.*

<sup>c</sup>*Department of Chemistry "U. Schiff", University of Florence, Via della Lastruccia 3, 50019 Sesto Fiorentino, Italy. E-mail: carla.bazzicalupi@unifi.it*

<sup>d</sup>*Department NEUROFARBA – Pharmaceutical and nutraceutical section; Laboratory of Molecular Modeling Cheminformatics & QSAR, University of Firenze, via Ugo Schiff 6, 50019 Sesto Fiorentino, Firenze, Italy. E-mail: paola.gratteri@unifi.it.*

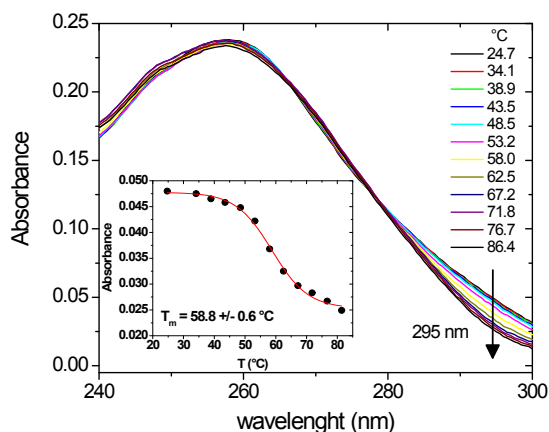

Figure S0. Example of variation of absorbance profile for the  $[\text{Au}(\text{NHC})_2]^+/\text{Tel 23}$  system at different temperatures;  $[\text{Tel23}] = 1.0 \mu\text{M}$ ,  $r = [\text{Au}(\text{NHC})_2]^+/\text{Tel 23} = 5.0$ , 50 mM potassium phosphate buffer, pH = 7.0, cell path 1.0 cm. Inset is the simoidal fit of the absorbance at 292 nm vs. temperature plot which provides the melting temperature,  $T_m$ .

**Table S1.** Data collection and data refinement about the crystal structure of the adduct formed by the complex  $[\text{Au}(\text{NHC})_2]^+$  and the human telomeric sequence Tel24.

| <b>Data collection</b>          |                                                                  |
|---------------------------------|------------------------------------------------------------------|
| Wavelength                      | 0.872900 Å                                                       |
| Cell parameters                 | $a = 36.600$ $b = 71.370$ Å $c = 27.050$ Å $\beta = 92.42^\circ$ |
| Crystal system                  | monoclinic                                                       |
| Space Group                     | C 2                                                              |
| Resolution limits               | 35.62-1.6(1.70-1.60) Å                                           |
| Number of reflections           | 48359 (5872)                                                     |
| Rsym                            | 11.0 (265.5)                                                     |
| Multiplicity                    | 5.4 (4.5)                                                        |
| Completeness (%)                | 97.6 (90.4)                                                      |
| $\langle I / \sigma(I) \rangle$ | 6.04(0.45)                                                       |
| CC (1/2)                        | 99.2 (22.5)                                                      |
| <b>Refinement</b>               |                                                                  |

|                                      |             |
|--------------------------------------|-------------|
| Resolution range                     | 35.62-2.00Å |
| Unique reflections<br>(working/free) | 4178/517    |
| Rfactor                              | 22.8%       |
| Rfree factor                         | 25.3%       |
| Non-hydrogen atoms                   | 567         |
| Drug atoms                           | 21          |
| Water molecules                      | 39          |
| RMSD bonds                           | 0.004       |
| RMSD angles                          | 1.114       |

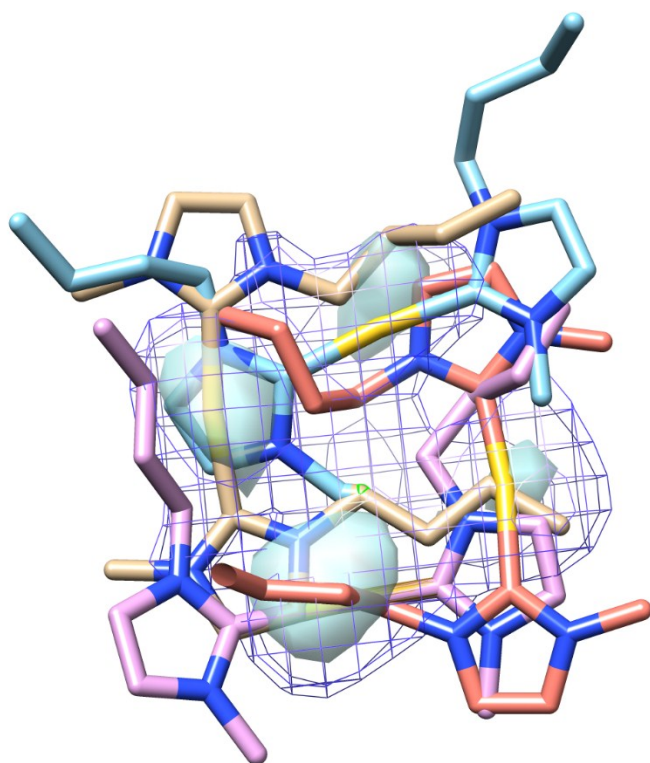

Figure S1 Skeleton of the disordered [Au(NHC)<sub>2</sub>]<sup>+</sup> complex, spread over four crystallographic positions. The following color code has been used to identify each single position: salmon (Au1), tan (Au2), light brown (Au3), light pink (Au4). OMIT electron density map (meshed) and anomalous Fourier difference map for the gold ions (continuous) contoured at 1.5 $\sigma$  and 3 $\sigma$  levels, respectively.
